# Supplementary material
Source: PubMed Central journal article supplement (PMC2872967)

**I $\kappa$ B kinase  $\beta$  regulates redox homeostasis by controlling the constitutive levels of glutathione**

Zhimin Peng, Esmond Geh, Liang Chen, Qinghang Meng, Yunxia Fan, Maureen Sartor, Howard G.

Shertzer, Zheng-Gang Liu, Alvaro Puga and Ying Xia

**Molecular Pharmacology****Supplemental Information**

**Supplemental figure 1. The extracellular GSH level.** The growth medium of wild type, *Ikk $\beta$* <sup>(-/-)</sup>, *Ikk $\beta$* <sup>(-/-)</sup> cells infected with  $\beta$ -gal adenovirus and IKK $\beta$  adenoviruses were collected and used for measuring extracellular GSH levels. Data are presented as the mean values  $\pm$  S.E. from at least three independent experiments. \*( $p < 0.05$ ); \*\*( $p < 0.01$ ); \*\*\*( $p < 0.001$ ) Statistically different from the mean values in wild type cells under same condition.

**Supplemental figure 2. (A)** Wild type, *Ikk $\beta$* <sup>(-/-)</sup>, *Traf2*<sup>(-/-)</sup>, *Tnfr1*<sup>(-/-)</sup> and *Ikk $\beta$* <sup>(-/-)</sup> cells infected with  $\beta$ -gal adenoviruses and IKK $\beta$  adenoviruses were transiently transfected with plasmids for  $\beta$ -galactosidase and NF- $\kappa$ B-luc. Twenty-four hours after transfection, the cells were treated with 10 ng/ml TNF $\alpha$  for 16 h. Luciferase activity was measured and normalized for  $\beta$ -galactosidase activities. Data are presented as the mean values  $\pm$  S.E. from at least three independent experiments. \*\*( $p < 0.01$ ); \*\*\*( $p < 0.001$ ) Statistically different from the mean values in wild type cells under same condition.

**S1**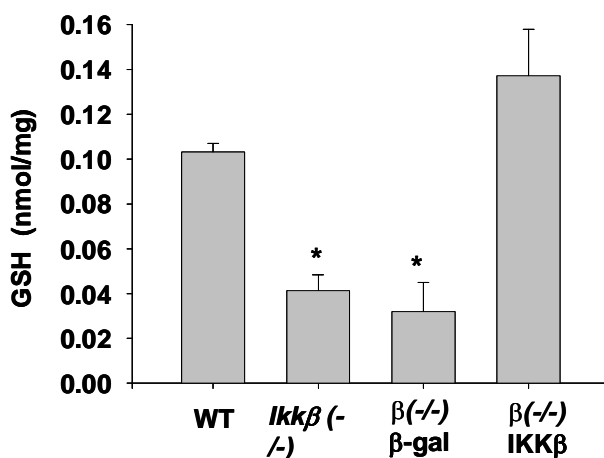**S2**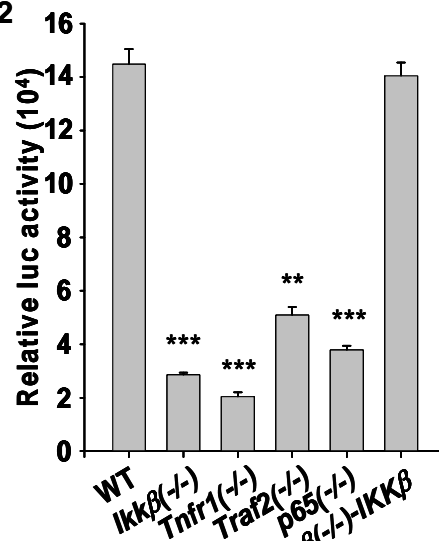

Supplement: supp_mol.109.061424_SupplementalInformation.pdf [file supp_mol.109.061424_SupplementalInformation.pdf]
